# Supplementary material for: Inhibition of LIFR Blocks Adiposity-Driven Endometrioid Endometrial Cancer Growth
Source: MDPI journal article supplement (doi:10.3390/cancers14215400), 2022-11-02

**Figure S1:** Original western blots for Figure 3C. Cropped sections used as figures in the manuscript are marked as a box.

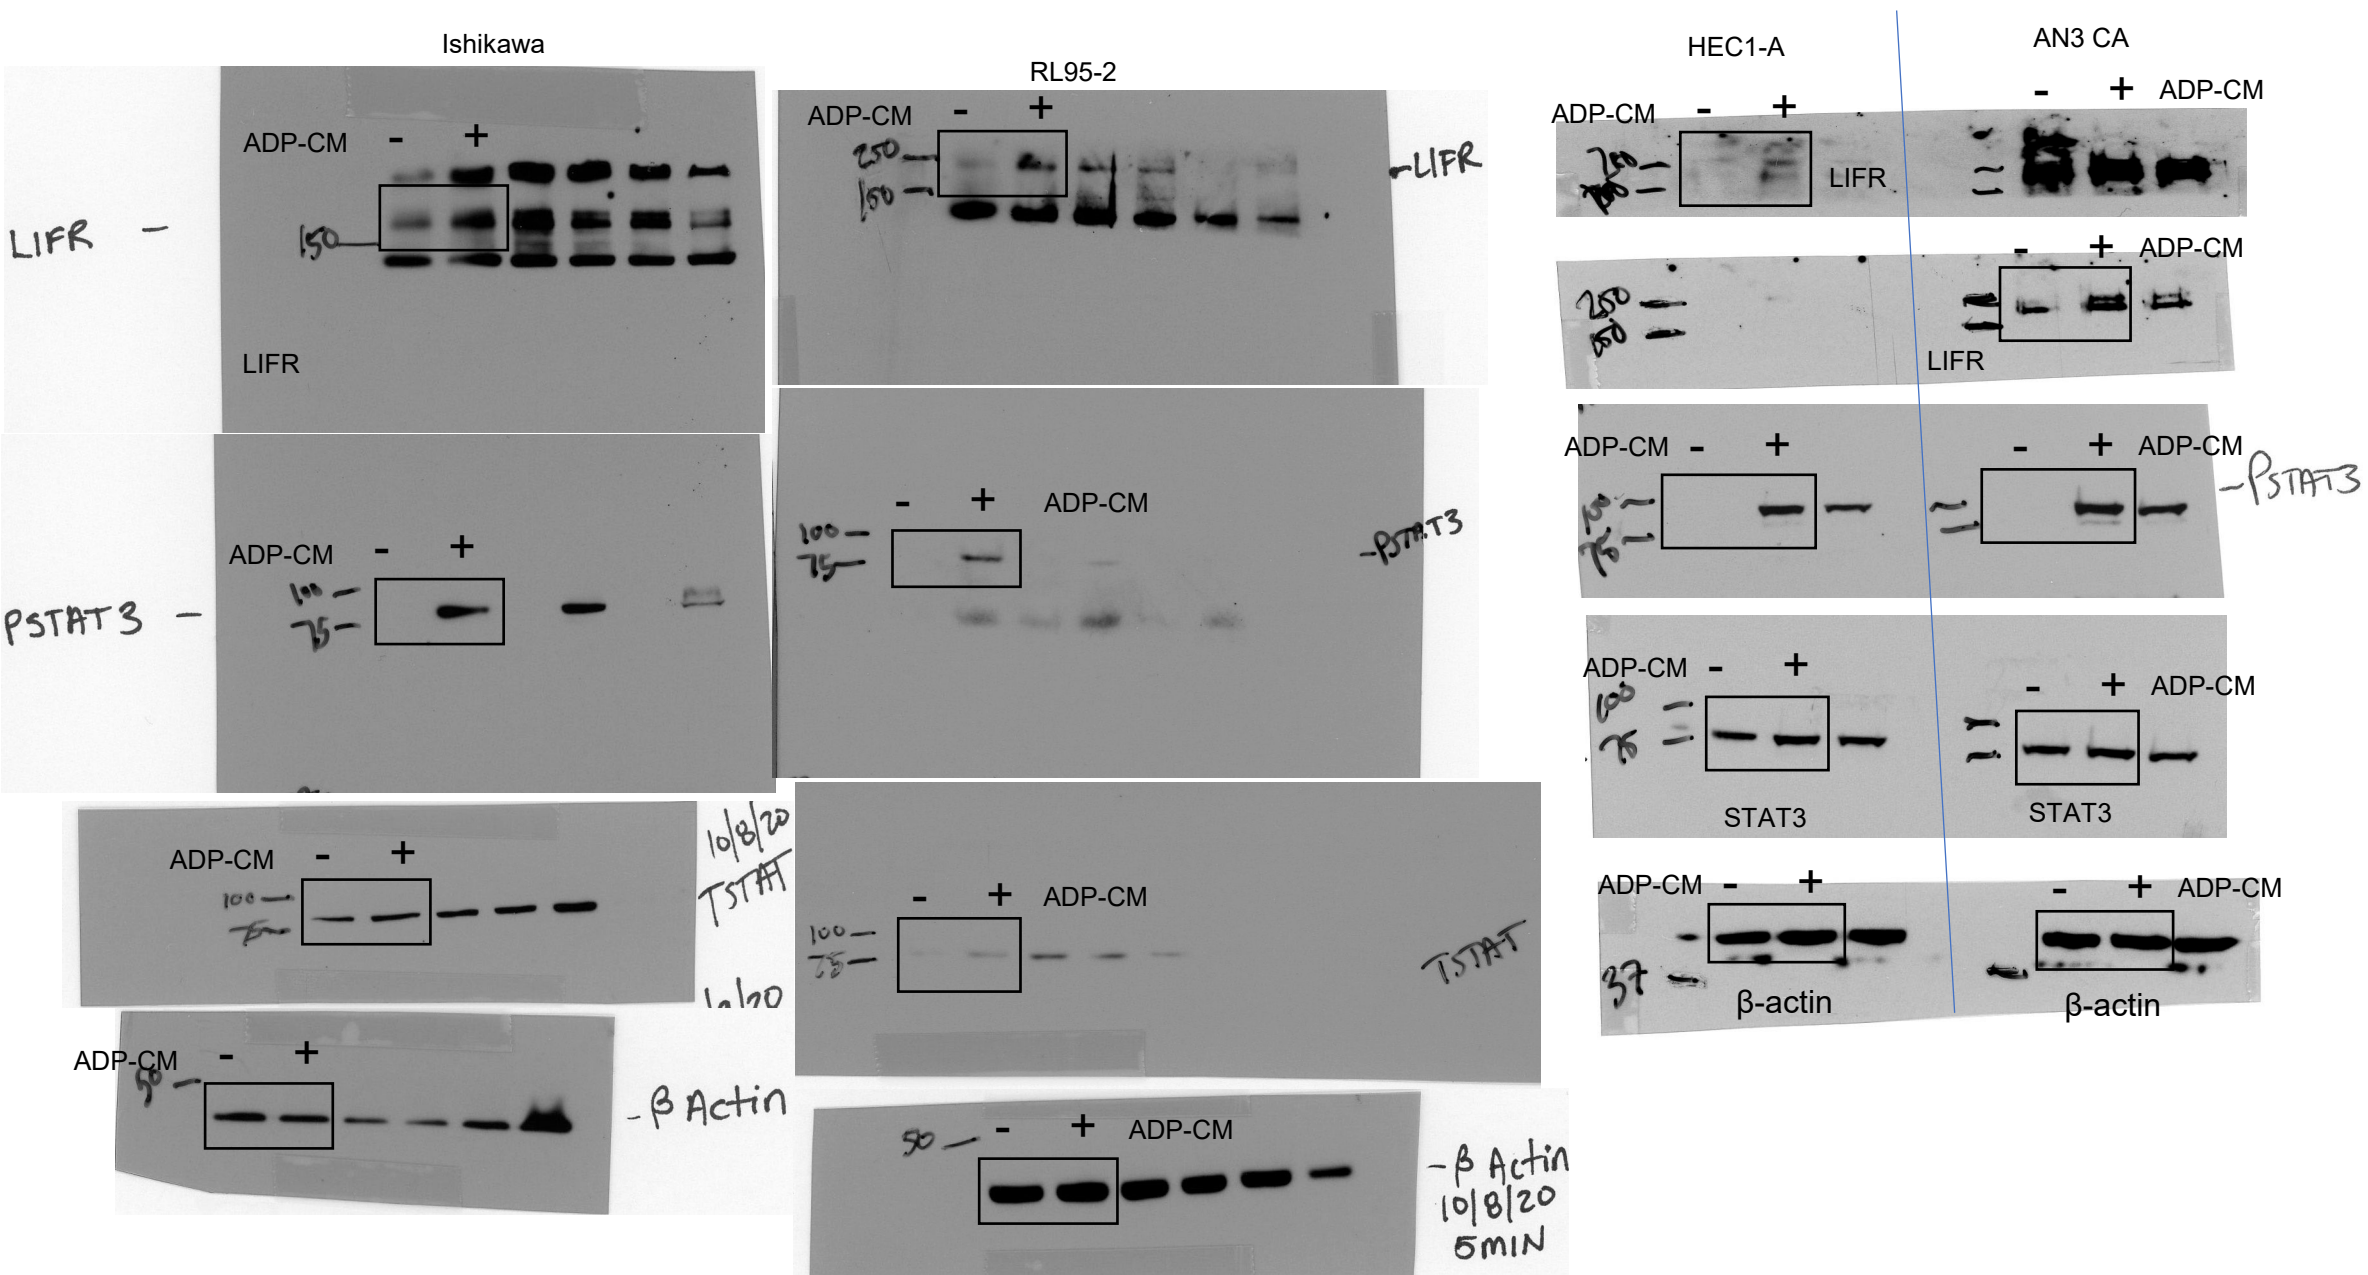

**Figure S1:** Original western blots for Figure 3 D. Cropped sections used as figures in the manuscript are marked as a box.

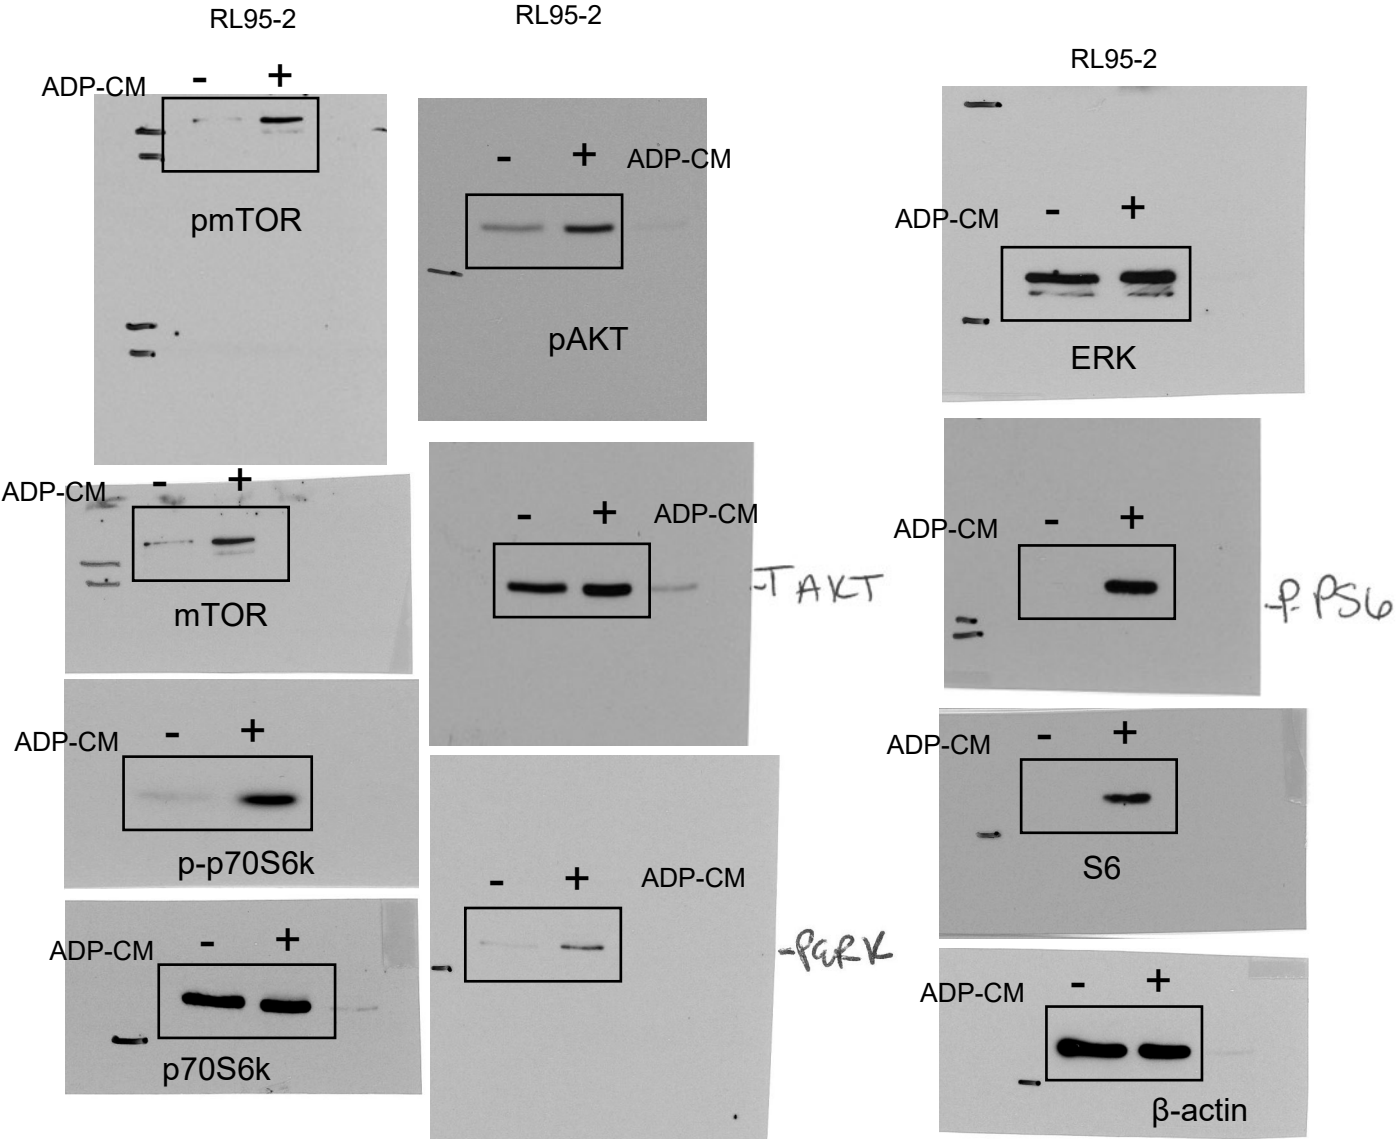

**Figure S2:** Original western blots for Figure 4F. Cropped sections used as figures in the manuscript are marked as a box.

EC14

Ishikawa

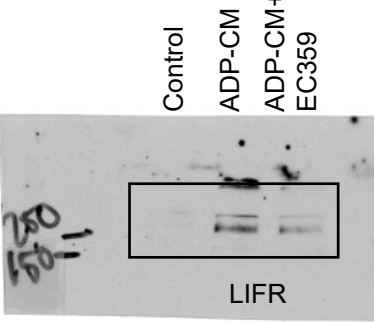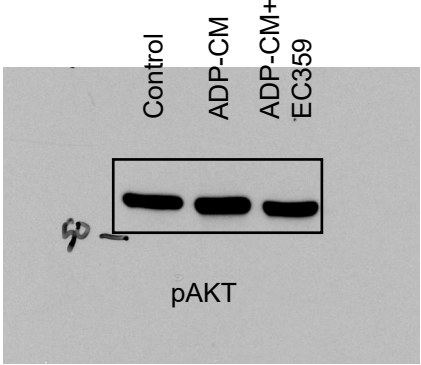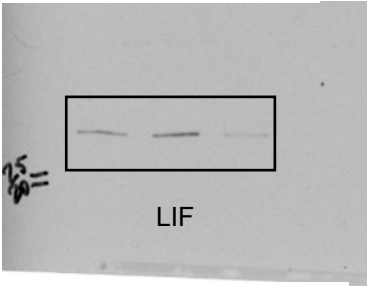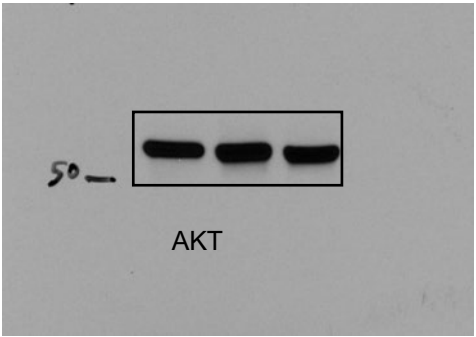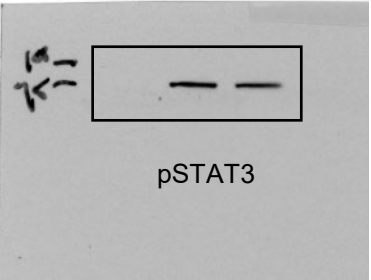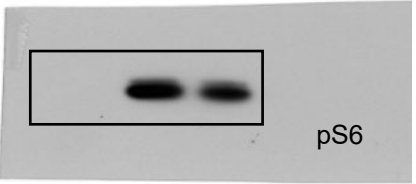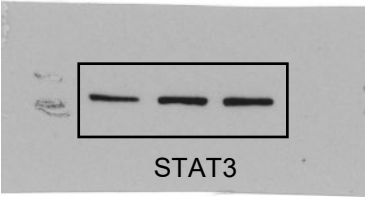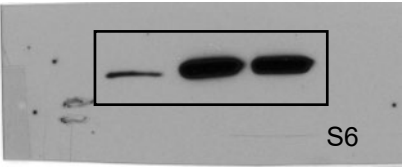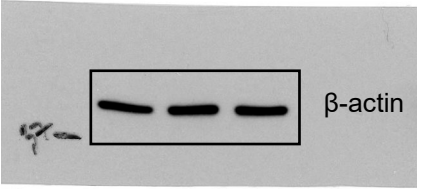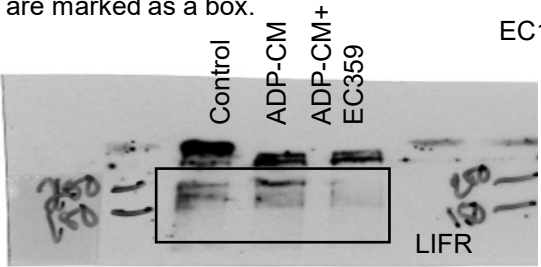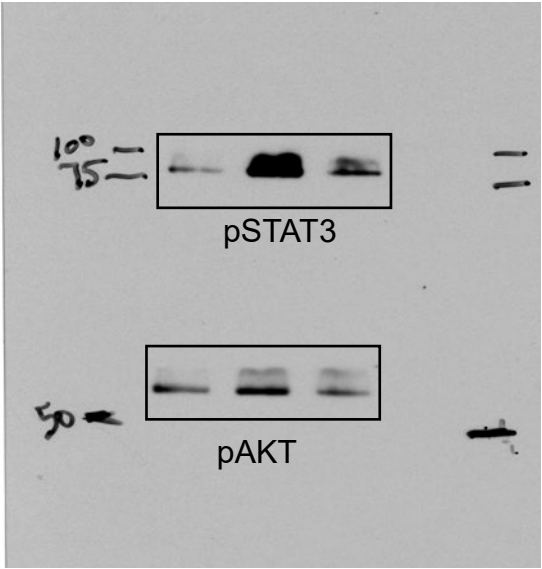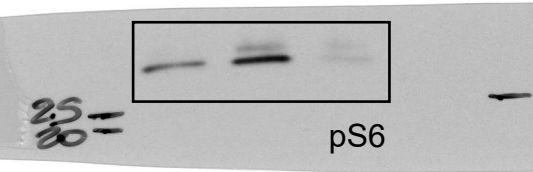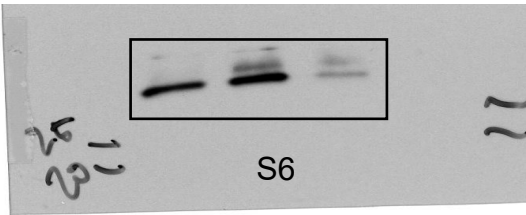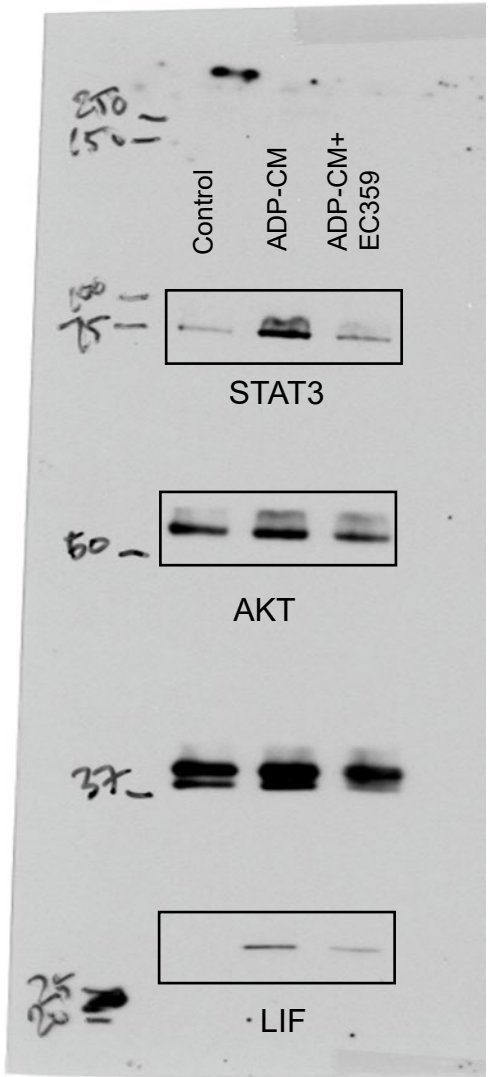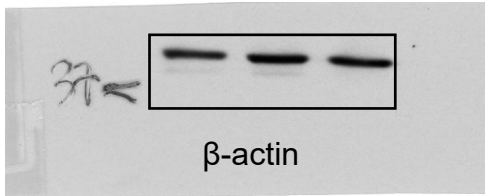

**Figure S3:** Original western blots for Figure 5A. Cropped sections used as figures in the manuscript are marked as a box.

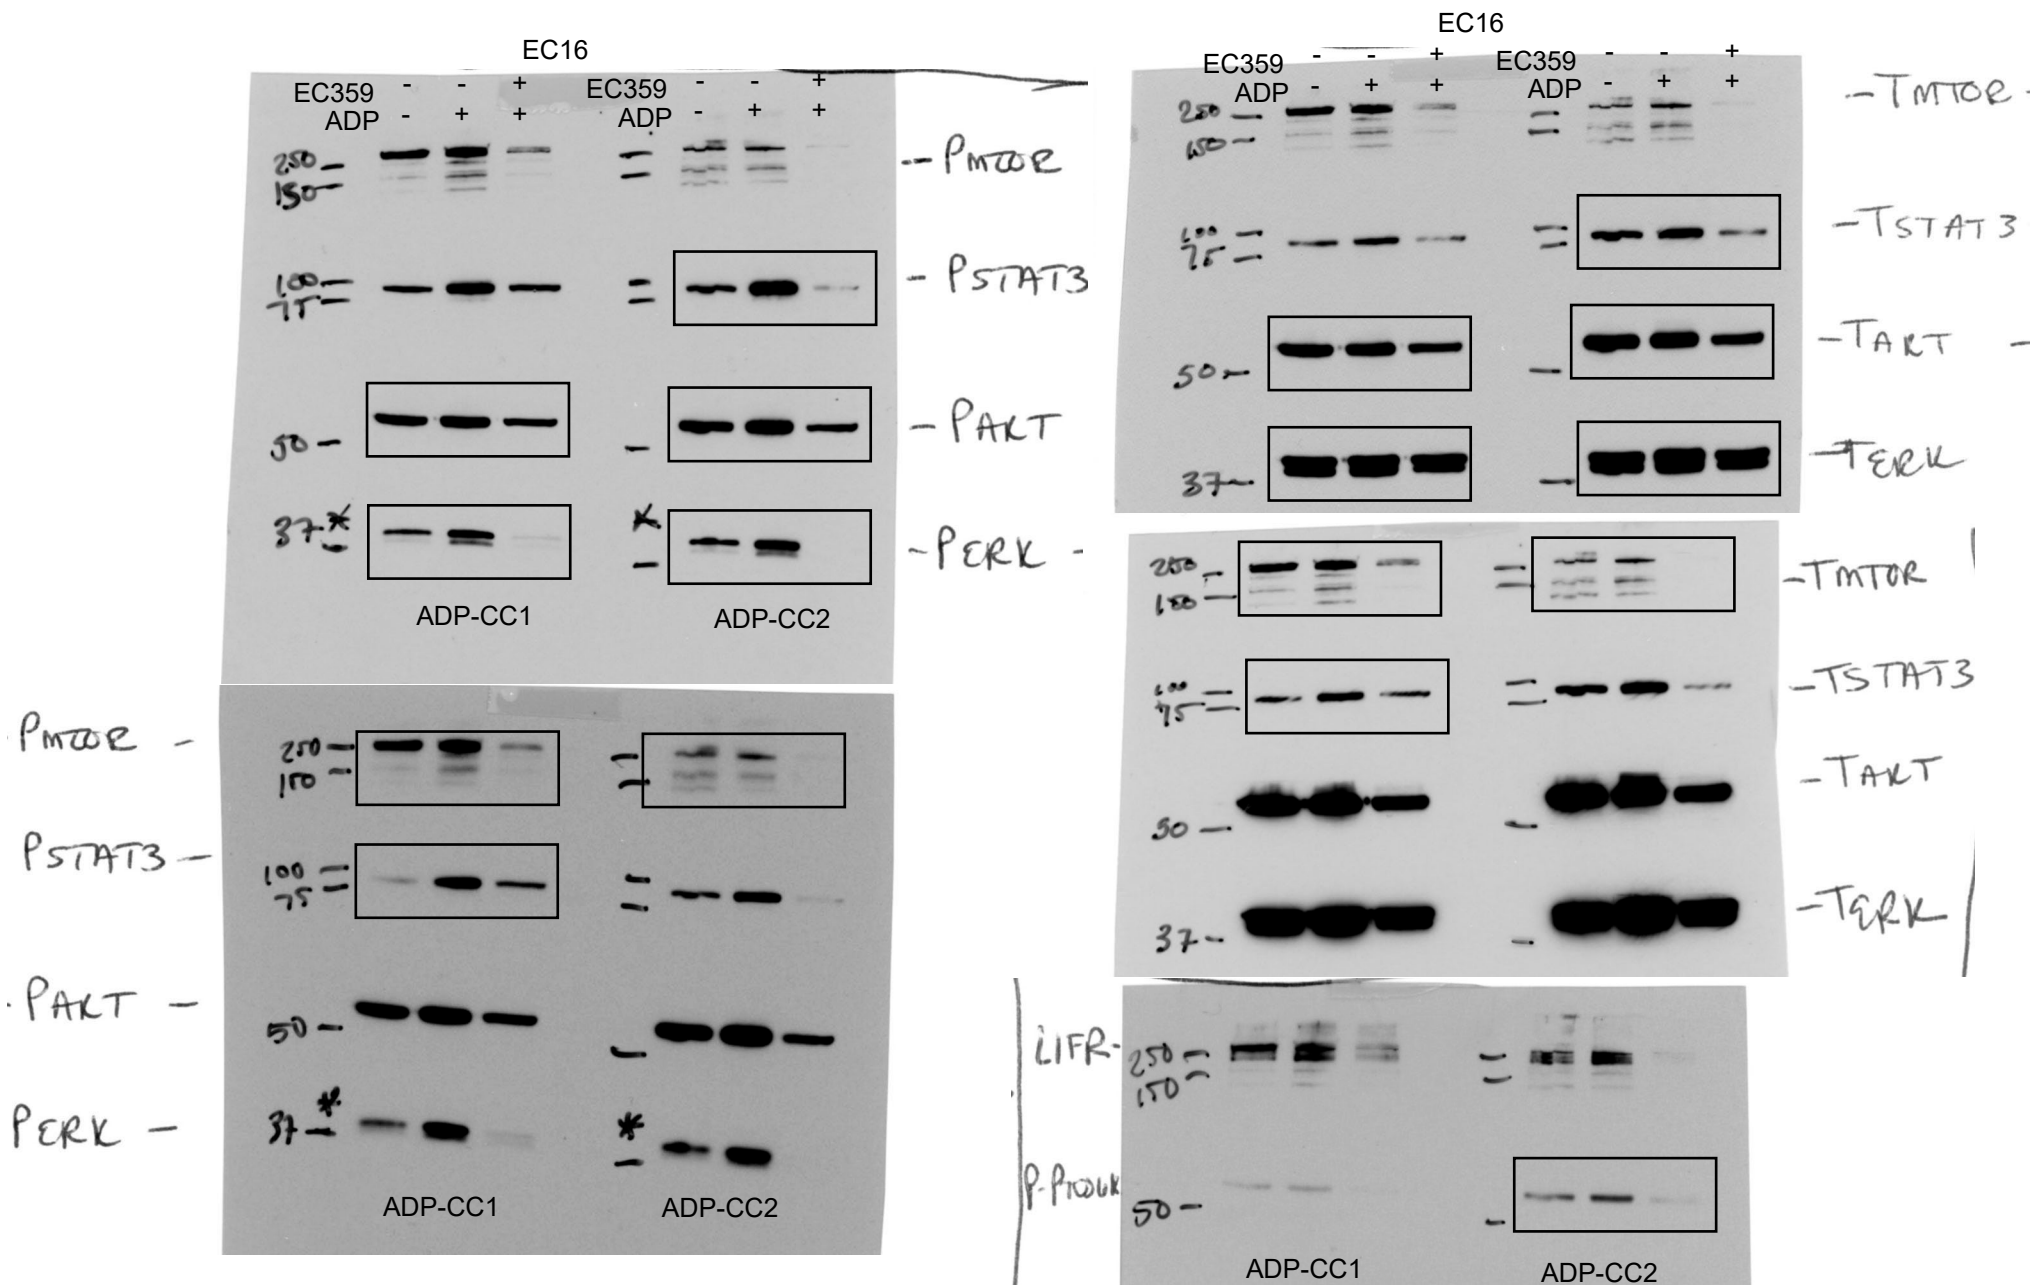



**Figure S3:** Original western blots for Figure 5A. Cropped sections used as figures in the manuscript are marked as a box.

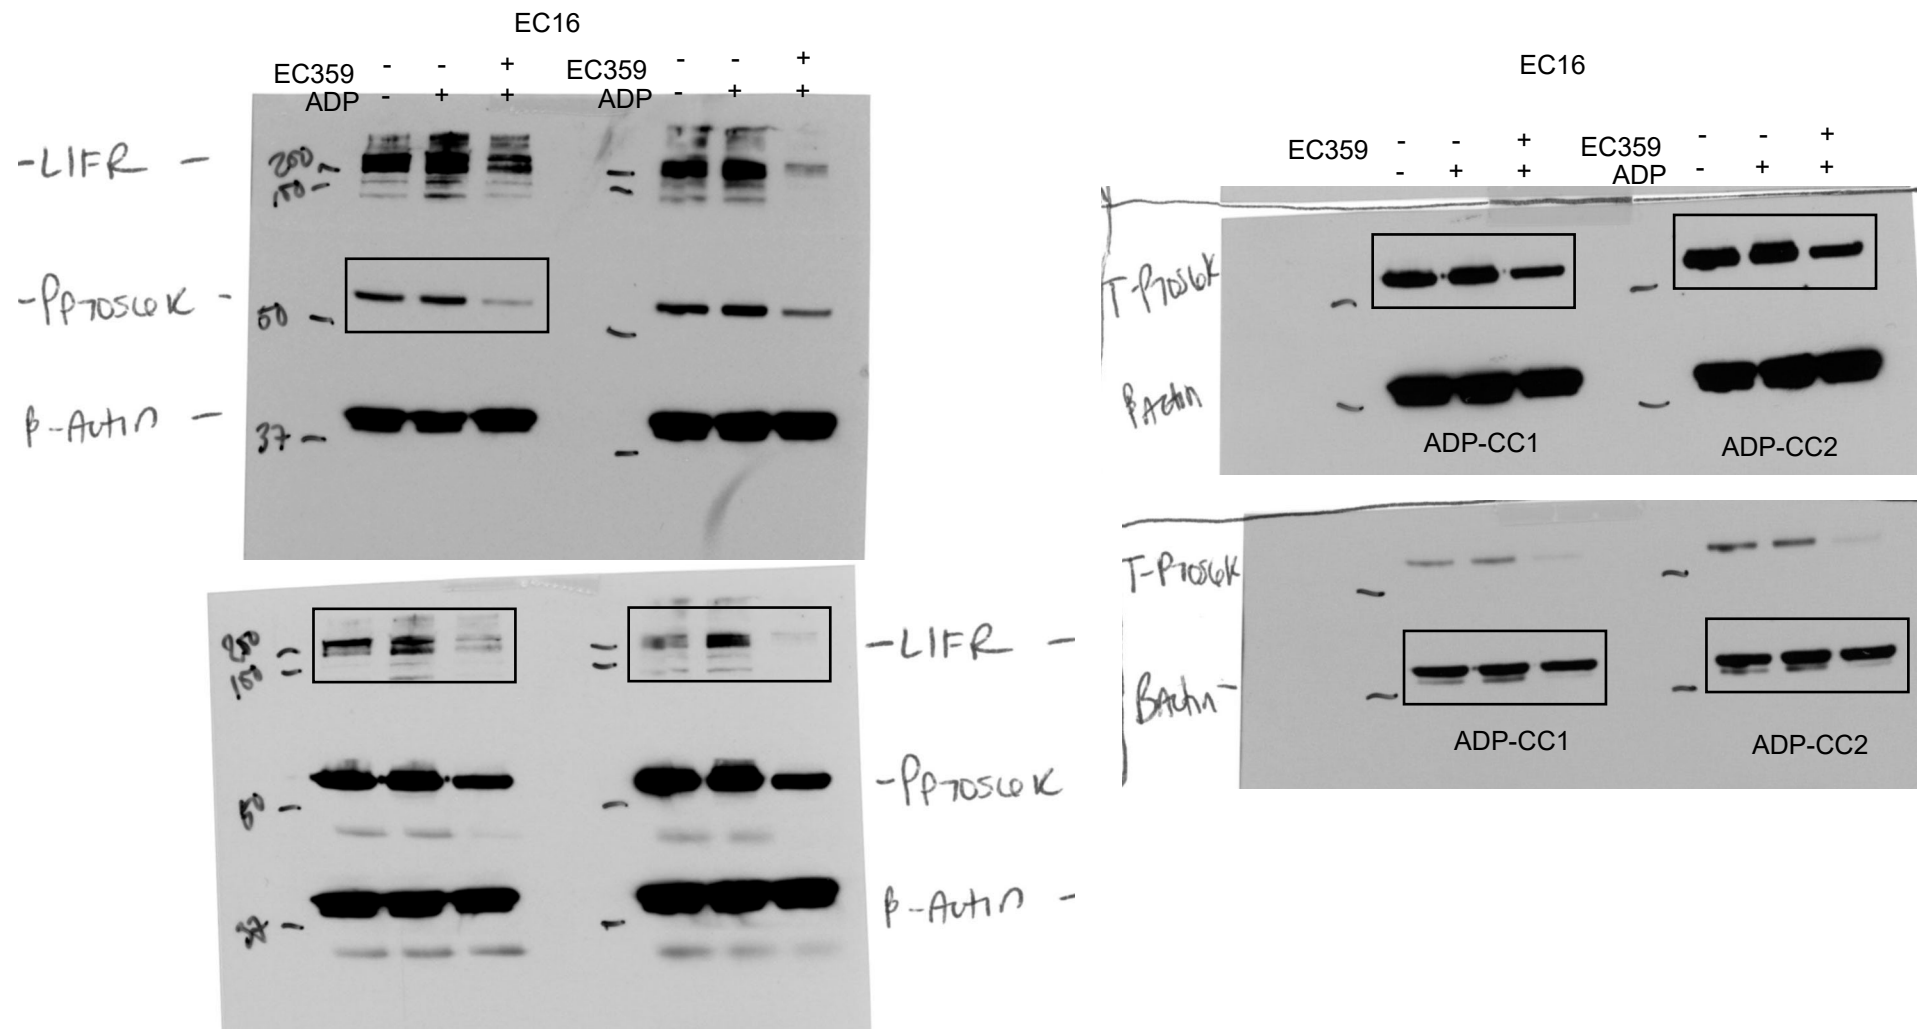

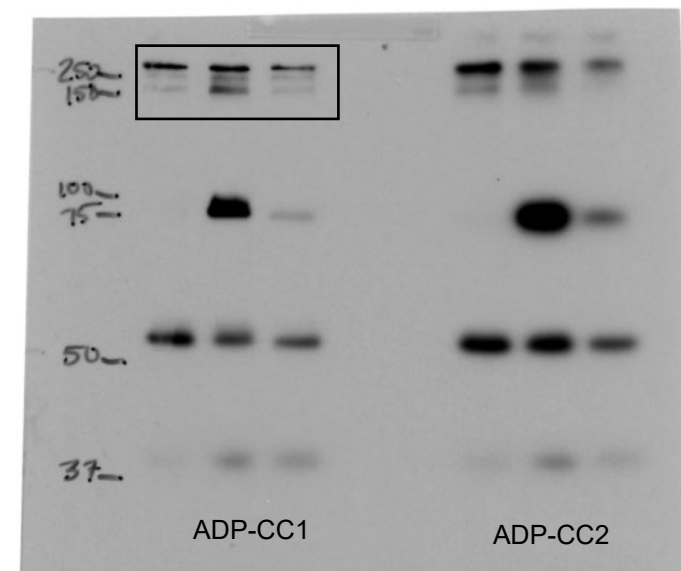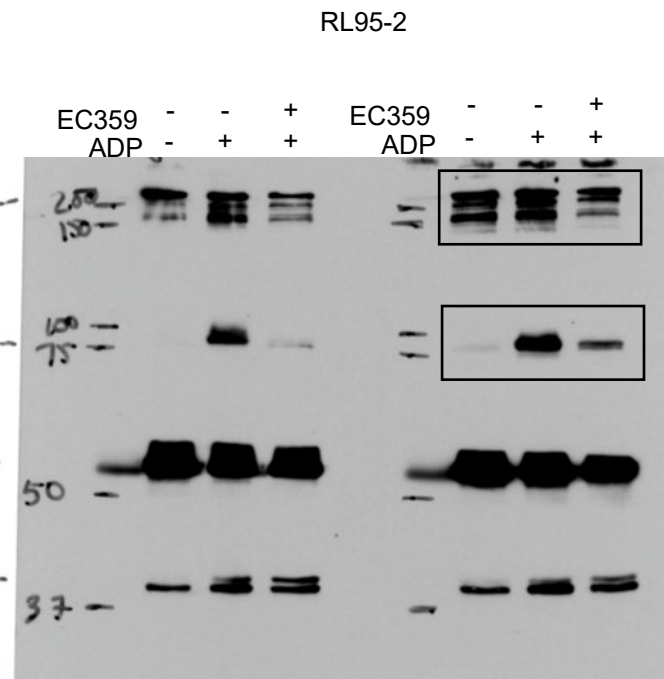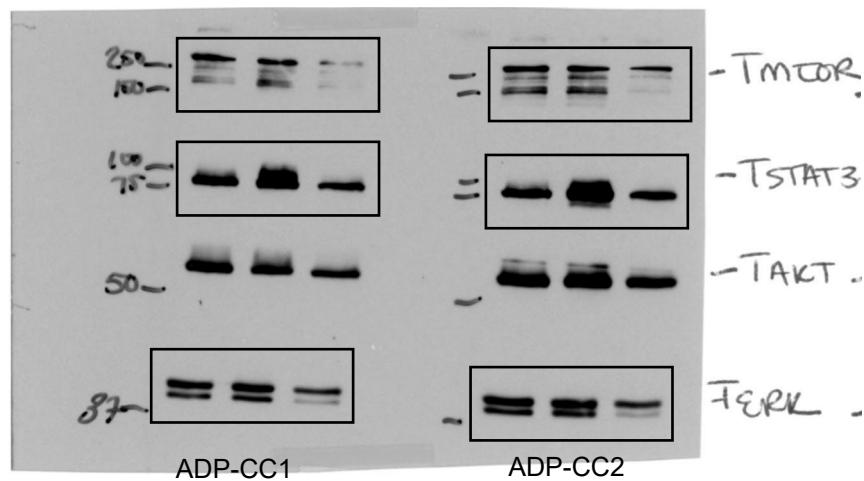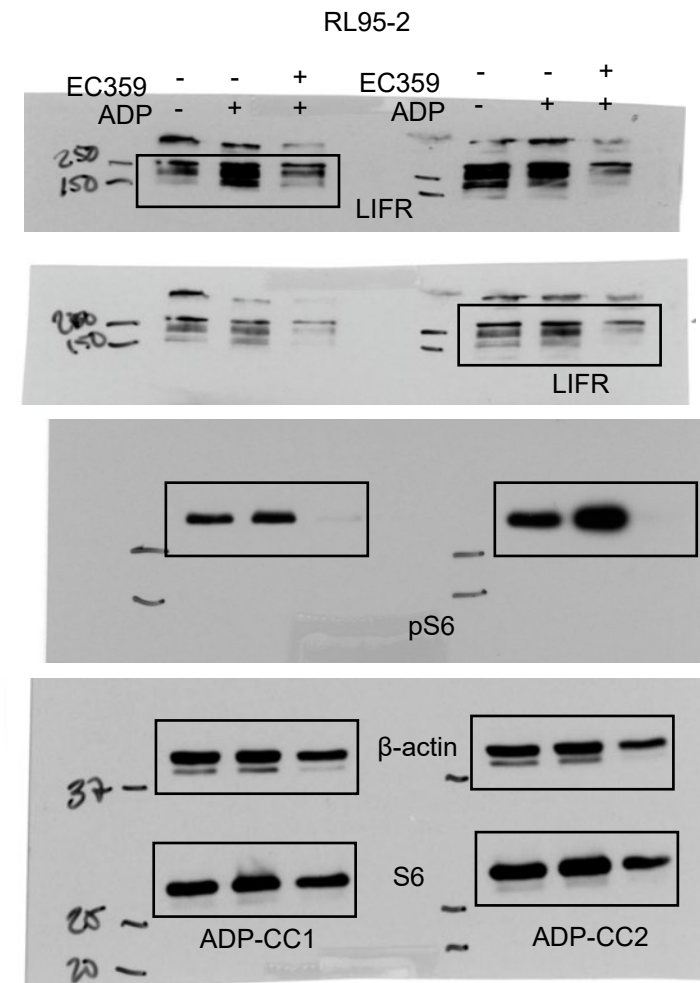

Supplement: s1 [file s1]
