# Supplementary material for: Inhibition of LIFR Blocks Adiposity-Driven Endometrioid Endometrial Cancer Growth
Source: MDPI journal article supplement (doi:10.3390/cancers14215400), 2022-11-02
Supplement: s1 [file s1]

**Supplementary Table S1: List of primers**

| Gene name | Forward Primer          | Reverse Primer           |
|-----------|-------------------------|--------------------------|
| GAPDH     | TCGACAGTCAGCCGCATCT     | CTAGCCTCCCGGGTTTCTCT     |
| LIFR      | TGTCAGGCGTTCTCGTCTC     | GAGTTGTGTTGTGGGTCACTAA   |
| AKT1      | AGCGACGTGGCTATTGTGAAG   | GCCATCATTCTTGAGGAGGAAGT  |
| HIF1A     | CACCACAGGACAGTACAGGAT   | CGTGCTGAATAATACCACTCACA  |
| TGFB1     | CAATTCCTGGCGATACCTCAG   | GCACAACTCCGGTGACATCAA    |
| ID1       | CTGCTCTACGACATGAACGG    | GAAGGTCCCTGATGTAGTCGAT   |
| ID2       | AGTCCCGTGAGGTCCGTTAG    | AGTCGTTTCATGTTGTATAGCAGG |
| ID3       | GAGAGGCACTCAGCTTAGCC    | TCCTTTTGTGCTTGGAGATGAC   |
| STAT1     | ATCAGGCTCAGTCGGGGAATA   | TGGTCTCGTGTTCTCTGTTCT    |
| SOX2      | TGCGAGCGCTGCACAT        | TCATGAGCGTCTTGGTTTTCC    |
| c-MYC     | GGCTCCTGGCAAAAGGTCA     | CTGCGTAGTTGTGCTGATGT     |
| JUNB      | ACGACTCATAACAGCTACGG    | GCTCGGTTTCAGGAGTTTGTAGT  |
| TIMP1     | CTTCTGCAATTCCGACCTCGT   | ACGCTGGTATAAGGTGGTCTG    |
| PTGS2     | CTGGCGCTCAGCCATACAG     | CGCACTTATACTGGTCAAATCCC  |
| SOCS2     | TTAAAAGAGGCACCAGAAGGAAC | AGTCGATCAGATGAACCACACT   |
| HIF1A     | CACCACAGGACAGTACAGGAT   | CGTGCTGAATAATACCACTCACA  |
| TGFB1     | CAATTCCTGGCGATACCTCAG   | GCACAACTCCGGTGACATCAA    |
| MCL-1     | GTAATAACACCAGTACGGACGG  | CCACAAACCCATCCTTGGAAG    |

**Supplementary Table S2: Tissue microarray map**

| Tumor |                          |              |       |       |
|-------|--------------------------|--------------|-------|-------|
| ID    | BMI (Kg/m <sup>2</sup> ) | Histology    | Grade | Stage |
| 1     | 31.4                     | Endometrioid | 1     | 1     |
| 2     | 31.4                     | Endometrioid | 2     | 4     |
| 3     | 32.1                     | Endometrioid | 2     | 3     |
| 4     | 32.1                     | Endometrioid | 2     | 1     |
| 5     | 32.6                     | Endometrioid | 1     | 1     |
| 6     | 33                       | Endometrioid | 1     | 1     |
| 7     | 33.4                     | Endometrioid | 1     | 7     |
| 8     | 34                       | Endometrioid | 1     | 1     |
| 9     | 34.7                     | Endometrioid | 1     | 1     |
| 10    | 35                       | Endometrioid | 2     | 6     |
| 11    | 36                       | Endometrioid | 2     | 1     |
| 12    | 36.7                     | Endometrioid | 1     | 1     |
| 13    | 37.6                     | Endometrioid | 1     | 1     |
| 14    | 38.9                     | Endometrioid | 1     | 1     |
| 15    | 39                       | Endometrioid | 1     | 1     |
| 16    | 39.3                     | Endometrioid | 2     | 1     |
| 17    | 39.9                     | Endometrioid | 1     | 1     |
| 18    | 40                       | Endometrioid | 2     | 1     |
| 19    | 40.6                     | Endometrioid | 1     | 1     |
| 20    | 40.8                     | Endometrioid | 3     | 1     |
| 21    | 40.9                     | Endometrioid | 1     | 1     |
| 22    | 41.1                     | Endometrioid | 1     | 1     |
| 23    | 41.5                     | Endometrioid | 2     | 1     |
| 24    | 41.9                     | Endometrioid | 1     | 1     |
| 25    | 42.5                     | Endometrioid | 1     | 1     |
| 26    | 42.8                     | Endometrioid | 1     | 4     |
| 27    | 42.9                     | Endometrioid | 1     | 1     |
| 28    | 43                       | Endometrioid | 1     | 1     |
| 29    | 43.4                     | Endometrioid | 1     | 1     |
| 30    | 43.5                     | Endometrioid | 1     | 1     |
| 31    | 43.5                     | Endometrioid | 2     | 7     |
| 32    | 43.6                     | Endometrioid | 1     | 1     |
| 33    | 44.3                     | Endometrioid | 1     | 1     |
| 34    | 45.7                     | Endometrioid | 2     | 1     |
| 35    | 45.9                     | Endometrioid | 1     | 1     |

| Normal |                          |
|--------|--------------------------|
| ID     | BMI (Kg/m <sup>2</sup> ) |
| 1      | 30.2                     |
| 2      | 32.6                     |
| 3      | 34.2                     |
| 4      | 34                       |
| 5      | 35.3                     |
| 6      | 35.3                     |
| 7      | 43.3                     |
| 8      | 44.2                     |
| 9      | 43.8                     |
| 10     | 30.1                     |
| 11     | 33.3                     |
| 12     | 30.9                     |
| 13     | 36.8                     |
| 14     | 37.5                     |
| 15     | 38.5                     |
| 16     | 40.9                     |
| 17     | 31.86                    |
| 18     | 31.6                     |
| 19     | 38.9                     |
| 20     | 37.6                     |
| 21     | 38.92                    |
| 22     | 42.5                     |
| 23     | 42.6                     |
| 24     | 34.5                     |
| 25     | 38.7                     |
| 26     | 39.4                     |
| 27     | 38.4                     |
| 28     | 36.9                     |
| 29     | 45.1                     |
| 30     | 58                       |
| 31     | 43.5                     |
| 32     | 44.6                     |
| 33     | 41.9                     |

|    |      |              |   |   |
|----|------|--------------|---|---|
| 36 | 48.6 | Endometrioid | 1 | 1 |
| 37 | 49.1 | Endometrioid | 1 | 1 |
| 38 | 49.3 | Endometrioid | 1 | 1 |
| 39 | 49.5 | Endometrioid | 1 | 1 |
| 40 | 50.6 | Endometrioid | 2 | 1 |
| 41 | 51.8 | Endometrioid | 1 | 1 |
| 42 | 57.3 | Endometrioid | 1 | 1 |
| 43 | 58   | Endometrioid | 2 | 4 |
| 44 | 58.4 | Endometrioid | 1 | 3 |
| 45 | 61.5 | Endometrioid | 1 | 1 |
| 46 | 68   | Endometrioid | 2 | 1 |
